# Supplementary material for: Fabrication of new multifunctional cotton–modal–recycled aramid blended protective textiles through deposition of a 3D-polymer coating: high fire retardant, water repellent and antibacterial properties
Source: Royal Society of Chemistry journal article supplement (doi:10.1039/d0nj02142c), 2020-01-01
Supplement: d0nj02142c1.pdf [file d0nj02142c1.pdf]

-----Supplementary information-----

**Fabrication of new multifunctional cotton-modal-recycled aramid blended protective textiles through deposition of 3D-polymer coating: High fire retardant, water repellent and antibacterial property**

**Mohammad Tofayel Ahmed<sup>1,3,\*</sup>, Mohammad Neaz Morshed<sup>2,3,\*</sup>, Sayeda Farjana<sup>3</sup>, Seung Kook An<sup>1</sup>**

<sup>1</sup> Department of Organic Material Science and Engineering, Pusan National University, Busan 46241, S. Korea

<sup>2</sup> Textile Materials Technology, Department of Textile Technology, The Swedish School of Textiles, Faculty of Textiles, Engineering and Business, University of Borås, SE-50190, Borås, Sweden

<sup>3</sup> Department of Textile Engineering, Southeast University, Dhaka 1215, Bangladesh

\* Corresponding Authors E-Mail Address: [tofayel@pusan.ac.kr](mailto:tofayel@pusan.ac.kr), & [mohammad\\_neaz.morshed@hb.se](mailto:mohammad_neaz.morshed@hb.se)

**1. Experimental**

**1.1. Synthesis of Tetrakis (hydroxymethyl) phosphonium chloride (THPC)**

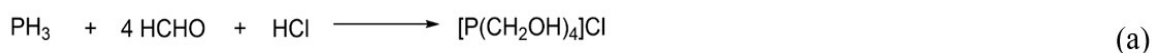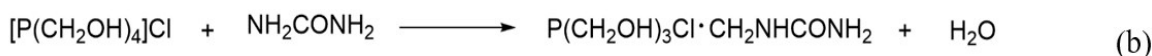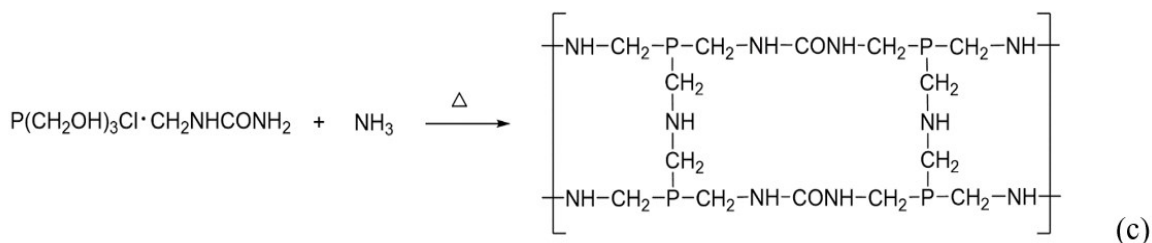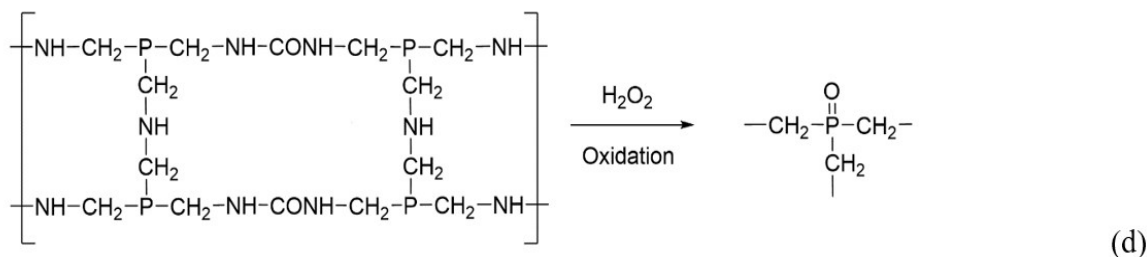

**Figure 1:** THPC reaction mechanism.

## 2. RESULTS

### 2.1. Physical analysis of the samples

**Table S1:** Water vapor permeability and air permeability analysis

| Sample | <sup>a</sup> Water Vapor Permeability (g/m <sup>2</sup> .h) | <sup>b</sup> Air permeability (mm/s) |
|--------|-------------------------------------------------------------|--------------------------------------|
| C100   | 196.51                                                      | 126.5                                |
| CMA-1  | 193.68                                                      | 22.1                                 |
| CMA-2  | 182.24                                                      | 16.9                                 |
| CMA-3  | 193.68                                                      | 170.1                                |
| CMA-4  | 184.01                                                      | 116.3                                |

<sup>a</sup>Experiment Method: KS K 0594:2015.  
<sup>b</sup>Experiment Method: KS K ISO 9237:1995, Sample fabric: 20 cm<sup>2</sup>, Static pressure: 100 Pa, (mm/s)\*6 = (cm<sup>3</sup>/min/cm<sup>2</sup>)

### 2.2. Dimensional change analysis after washing and drying.

**Table S2:** Analysis of dimensional change (%) after washing and drying

| Sample | Warp | Weft |
|--------|------|------|
| C100   | -1.5 | -1   |
| CMA-1  | -3.5 | -1   |
| CMA-2  | -3.5 | -1   |
| CMA-3  | -3.5 | -1   |
| CMA-4  | -3   | -1   |

Experiment Method: KS K ISO 5077:2014 (Laundry Method: KS K ISO 6330:2011, 9B)  
Kenmore Automatic Washing Machine, Normal Cycle, (30±3)°C, WOB, Net Dry, Laundry weight-2 k)
